## POSTER PRESENTATIONS

B23

TITLE: ANALYSIS OF THE INTRAPULMONARY DISTRIBUTION OF VENTILATION AND PO<sub>2</sub> IN PATIENTS AFTER SINGLE-LUNG TRANSPLANTATION: A <sup>3</sup>HELIUM-MRI STUDY

AUTHORS: B. Eberle, K. Markstaller, A. Deninger\*\*, H.-U. Kauczor\*, N. Weiler

AFFILIATION: Departments of Anesthesiology and \*Radiology, \*\*Institute of Physics, Johannes Gutenberg -University, D-55131 Mainz, Germany

Beyond high-resolution morphological imaging of ventilated airspaces, magnetic resonance imaging (MRI) of the lungs with inhaled laser-polarized <sup>3</sup>Helium (<sup>3</sup>HeMRI) offers a new route to non-invasive regional analysis of <sup>3</sup>He-distribution and O<sub>2</sub> partial pressure (PO<sub>2</sub>) in the lungs (1,2). In volunteers and patients, we investigated the ability of <sup>3</sup>HeMRI to detect large, functionally significant regional differences in the distribution of ventilation and alveolar PO<sub>2</sub>.

**Patients and Methods:** With Ethics Committee approval and informed consent, 8 healthy volunteers (age, 24-43 yr) and 5 patients (48-64 yr) with idiopathic pulmonary fibrosis (IPF) after single lung transplantation (SLTX) underwent conventional pulmonary function tests (PFT) and <sup>3</sup>He-MRI (1.5 T-MRI; single-breath inspiration of 200 ml <sup>3</sup>He, 28% polarized). Relative signal intensity (SNR) and regional PO<sub>2</sub> (P<sub>R</sub>O<sub>2</sub>) were determined in 3 representative regions of interest in the periphery of each healthy, grafted, or fibrotic native lung. Data are means ± SD. \* = p < .05 vs. healthy volunteers; ° = p < .05 vs. native IPF lung; VC = vital capacity; P<sub>a</sub>O<sub>2</sub> = arterial PO<sub>2</sub>.

| Results:                              | Healthy volunteers |           | IPF-SLTX patients |            |
|---------------------------------------|--------------------|-----------|-------------------|------------|
| VC (% predicted)                      | 106 ± 9            |           | 68 ± 12 *         |            |
| P <sub>a</sub> O <sub>2</sub> (mm Hg) | 95 ± 8             |           | 81 ± 7 *          |            |
|                                       | Right lung         | Left lung | IPF lung          | Graft      |
| SNR (%)                               | 52 ± 4             | 48 ± 4    | 35 ± 1            | 65 ± 11 °  |
| P <sub>R</sub> O <sub>2</sub> (mm Hg) | 117 ± 24           | 115 ± 17  | 74 ± 34 *         | 96 ± 25 °° |

**Conclusions:** The <sup>3</sup>He-MRI results determined selectively for each lung are consistent with the conventional PFT findings. The unbalanced distribution of inspired <sup>3</sup>He signal in IPF/SLTX patients indicates reduced ventilation of the fibrotic native lung, due to restriction. The patients' subnormal P<sub>R</sub>O<sub>2</sub> values are consistent with ventilation-perfusion mismatch (increased in the IPF lungs vs. the grafted lung), which reduces P<sub>a</sub>O<sub>2</sub> in this group significantly. <sup>3</sup>He-MRI appears to be a promising tool not only for lung imaging, but also for non-invasive regional pulmonary function analysis.

This study was supported by the German Research Society (DFG TH 315/8)

### References:

- 1) J Appl Physiol 87:2043 (1999)
- 2) J Magn Reson 141:207(1999).

B24

### MECHANISMS OF ACUTE POSTOPERATIVE HYPOMAGNESEMIA

Marcella J Lanzinger MD\*, Eugene W Moretti MD\*, Robert F Wildermann\*, John G Toffaletti PhD\*, Richard E Moon MD\*†  
Departments of Anesthesiology\*, Medicine† and Pathology\*, Duke University Medical Center, Durham, NC 27710

#### Introduction:

Clinical observations suggest that major surgery or trauma leads to hypomagnesemia. The mechanisms of perioperative decrease of Mg are undetermined, but could include urinary loss, hypoproteinemia, extracellular fluid dilution, or intracellular redistribution. This study was designed to evaluate patients undergoing major abdominal surgery for hypomagnesemia and to investigate possible mechanisms of acute postoperative hypomagnesemia.

#### Methods:

After institutional approval and informed consent, 16 adult patients with normal renal function undergoing major abdominal surgery were studied. Arterial blood samples were obtained before and after surgery and analyzed for total Mg [Mg] (J&J Vitros Analyzer), ionized Mg [iMg] (AVL 988-4 Electrolyte Analyzer), ionized calcium [iCa], albumin and pH. Urine was collected throughout the case and sent for measurement of [Mg]. Statistical analysis was performed with paired t-test and regression analysis.

#### Results:

16 patients (8 female, 8 male), age 29-85 (mean 66.5) years were studied. Urine Mg excretion was 1.77-0.06 (mean 0.87) mM, [Mg]\*1.85±0.22 vs 1.45±0.25 mM (mean±SD, preop vs postop), [iMg]\*0.52±0.07 vs 0.44±0.07 mM, [iCa]\*1.15±0.11 vs 1.09±0.11 mM, albumin\*2.95±0.69 vs 1.83±0.56 g/dl, [H+] 38.04±4.07 vs 40.68±3.52. \* = p < 0.05. The relationship between [iCa], [Mg], [iMg] and albumin for all data points is shown in the figure.

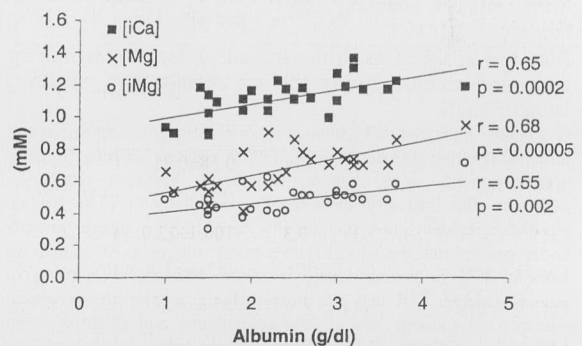

#### Discussion:

There was a significant drop in [Mg] in the vast majority of our patients. This can only partly be explained by the decrease in albumin, since [iMg] also decreased. Thus, the mechanism is likely also to include intracellular redistribution or dilution of the extracellular compartment with fluids not containing Mg. In several patients postoperative Mg decreased to levels that could be unacceptably low. Since, unlike calcium, there is no known primary regulatory mechanism for Mg, this may suggest a need for intraoperative supplementation of Mg during major abdominal surgery.
